# Supplementary material
Source: publisher site journal article supplement (https://www.dovepress.com/article/438722)
Supplement: Supplementary file 1 [file get_supplementary_file.php]

Supplementary Table 1. Diagnostic criteria of the cardiac arrhythmia diseases in current study

| Disease Diagnosis | Minnesota code | Diagnostic criteria |
| --- | --- | --- |
| Atrioventricular block (AVB) |  |  |
| First-degree AVB | 6-3 | P waves associated with 1:1 atrioventricular conduction and a PR interval >200ms (this is more accurately defined as atrioventricular delay because no P waves are blocked). |
| Second-degree AVB | 6-2 | P waves with a constant rate (<100 bpm) where atrioventricular conduction is present but not 1:1 |
| Mobitz type I: P waves with a constant rate (<100 bpm) with a periodic single nonconducted P wave associated with P waves before and after the nonconducted P wave with inconstant PR intervals. |
| Mobitz type II is characterized by fixed PR intervals before and after blocked beats and is usually associated with a wide QRS complex. |
| Third-degree AVB | 6-1 | P wave and QRS wave were rhythmical and uncorrelated with each other. Atrial rate was faster than ventricular rate. |
| Bundle branch block (BBB) |  |  |
| Right BBB (RBBB) |  |  |
| Complete RBBB | 7-2 | 1) QRS duration of 120ms or longer in the presence of normal sinus rhythm or supraventricular rhythm; 2) R or rSR′ complex in lead V1; 3) rS in leads V5, V6, I, or aVL with prolonged shallow S wave. |
| Incomplete RBBB | 7-3 | Same QRS morphology criteria as complete RBBB but with a QRS duration between 110 and 119ms. |
| Left BBB (LBBB) |  |  |
| Complete LBBB | 7-1 | 1) QRS duration of 120ms or longer in the presence of normal sinus rhythm or supraventricular rhythm (not atrial fibrillation); 2) QS or rS complex in lead V1; 3) broad R waves in leads I, aVL, V5-V6 (or an rS pattern in V5-V6); 4) absence of Q waves in leads V5, V6, or I. |
| Incomplete LBBB | 7-6 | 1) QRS duration between 110 and 119ms in adults; 2) Presence of left ventricular hypertrophy pattern; 3) R peak time >60ms in leads V4, V5, and V6; 4) Absence of Q wave in leads I, V5, and V6. |
| Left anterior fascicular block |  | 1) QRS duration <120ms; 2) Frontal plane axis between −45° and −90°; 3) R-peak time in lead aVL of ≥45ms; 4) qR (small r, tall R) pattern in lead aVL; 5) rS pattern (small r, deep S) in leads II, III, and aVF. |
| Left posterior fascicular block |  | 1) QRS duration <120ms; 2) Frontal plane axis between 90° and 180°; 3) rS (small r, deep S) pattern in leads I and aVL4) qR (small q, tall R) pattern in leads III and aVF. |
| Nonspecific intraventricular conduction disturbance (NS-IVCD) | 7-4 | QRS duration >110 ms when both RBBB and LBBB are excluded. |

Supplementary Table 2. Associations between the level of MLR and the risk of CCB and its subtypes

|  | HR (95% CI) | | | |
| --- | --- | --- | --- | --- |
| Q1 | Q2 | Q3 | Q4 |
| Cardiac conduction block, N (%) | 806 (4.05) | 719 (3.49) | 836 (3.89) | 861 (4.21) |
| Incidence density (per 1000 persons-years) | 3.829 | 3.322 | 3.756 | 4.121 |
| Model 1 | 1.106 (1.000-1.223) | Ref. | 1.134 (1.027-1.253) | 1.218 (1.102-1.345) |
| Model 2 | 1.106 (1.000-1.223) | Ref. | 1.134 (1.027-1.253) | 1.216 (1.101-1.344) |
| Model 3 | 1.107 (1.001-1.224) | Ref. | 1.133 (1.026-1.252) | 1.211 (1.096-1.339) |
| Model 4 | 1.106 (1.000-1.224) | Ref. | 1.134 (1.026-1.253) | 1.212 (1.097-1.340) |
| Atrioventricular block, N (%) | 256 (1.29) | 193 (0.94) | 250 (1.16) | 250 (1.22) |
| Incidence density (per 1000 persons-years) | 1.203 | 0.882 | 1.109 | 1.182 |
| Model 1 | 1.293 (1.072-1.558) | Ref. | 1.263 (1.047-1.525) | 1.310 (1.084-1.582) |
| Model 2 | 1.291 (1.070-1.556) | Ref. | 1.264 (1.055-1.536) | 1.322 (1.094-1.582) |
| Model 3 | 1.283 (1.064-1.547) | Ref. | 1.273 (1.054-1.535) | 1.326 (1.097-1.602) |
| Model 4 | 1.282 (1.063-1.546) | Ref. | 1.273 (1.055-1.537) | 1.325 (1.096-1.601) |
| Right bundle branch block, N (%) | 403 (2.02) | 347 (1.68) | 407 (1.89) | 349 (1.71) |
| Incidence density (per 1000 persons-years) | 1.900 | 1.591 | 1.812 | 1.653 |
| Model 1 | 1.149 (0.995-1.326) | Ref. | 1.151 (0.997-1.328) | 1.046 (0.901-1.215) |
| Model 2 | 1.148 (0.994-1.325) | Ref. | 1.151 (0.998-1.329) | 1.046 (0.901-1.215) |
| Model 3 | 1.148 (0.995-1.326) | Ref. | 1.153 (0.999-1.331) | 1.048 (0.902-1.218) |
| Model 4 | 1.148 (0.994-1.325) | Ref. | 1.154 (1.000-1.332) | 1.048 (0.902-1.218) |
| Left bundle branch block, N (%) | 153 (0.77) | 165 (0.80) | 168 (0.78) | 214 (1.05) |
| Incidence density (per 1000 persons-years) | 0.718 | 0.754 | 0.744 | 1.011 |
| Model 1 | 0.918 (0.736-1.144) | Ref. | 0.982 (0.792-1.218) | 1.281 (1.044-1.572) |
| Model 2 | 0.919 (0.737-1.145) | Ref. | 0.982 (0.792-1.217) | 1.278 (1.041-1.568) |
| Model 3 | 0.923 (0.741-1.151) | Ref. | 0.976 (0.787-1.210) | 1.261 (1.027-1.549) |
| Model 4 | 0.924 (0.741-1.151) | Ref. | 0.976 (0.787-1.210) | 1.261 (1.027-1.548) |
| Model 1 adjusted for age and sex. Model 2 adjusted for variables in model 1 and smoking, alcohol consumption, body mass index, and physical activity. Model 3 adjusted for variables in model 2 and diabetes, hypertension, hyperlipidemia, eGFR, hs-CRP, and snoring. Model 4 adjusted for variables in model 3 and antihypertensive, lipid-lowering and glucose-lowering drugs. Q1: MLR<0.125, Q2: MLR 0.125-0.167, Q3: MLR 0.167-0.219, Q4: MLR≥0.219; Abbreviation: MLR, monocyte to lymphocyte ratio; hs-CRP, high-sensitivity C-reactive protein; eGFR, estimated glomerular filtration rate; Ref, reference; HR, hazard ratio and CI, confidence interval. | | | | |

Supplementary Table 3. Associations between the level of MLR and the risk of LBBB

|  | HR (95% CI) | | | | *P*fortrend | Per 1 Risk-factor Control |
| --- | --- | --- | --- | --- | --- | --- |
| Q1 | Q2 | Q3 | Q4 |
| MLR score | <0.125 | 0.125-0.167 | 0.167-0.219 | ≥0.219 |  |  |
| Left bundle branch block |  |  |  |  |  |  |
| Model | Ref. | 1.083 (0.869-1.349) | 1.056 (0.848-1.316) | 1.365 (1.106-1.685) | <0.05 | 3.05 (1.520-6.118) |
| Model adjusted for age, sex, smoking, alcohol consumption, body mass index, physical activity, diabetes, hypertension, hyperlipidemia, eGFR, hs-CRP, snoring, antihypertensive, lipid-lowering and glucose-lowering drugs.  Abbreviation: MLR, monocyte to lymphocyte ratio; hs-CRP, high-sensitivity C-reactive protein; eGFR, estimated glomerular filtration rate; Ref, reference; HR, hazard ratio and CI, confidence interval. | | | | | | |

Supplementary Table 4. Associations between the level of MC and LC and the risk of CCB

| Cardiac conduction block | Model 1  HR (95% CI) | Model 2  HR (95% CI) | Model 3  HR (95% CI) | Model 4  HR (95% CI) |
| --- | --- | --- | --- | --- |
| MC (109/L) |  |  |  |  |
| <0.3 | Ref. | Ref. | Ref. | Ref. |
| 0.3-0.4 | 1.008 (0.911-1.115) | 1.007 (0.910-1.113) | 1.006 (0.910-1.113) | 1.006 (0.910-1.113) |
| 0.4-0.5 | 1.100 (1.001-1.209) | 1.101 (1.002-1.210) | 1.096 (0.997-1.205) | 1.097 (0.997-1.206) |
| ≥0.5 | 1.025 (0.919-1.143) | 1.024 (0.918-1.142) | 1.018 (0.912-1.137) | 1.020 (0.913-1.138) |
| LC (109/L) |  |  |  |  |
| <1.8 | 1.015 (0.922-1.118) | 1.016 (0.922-1.118) | 1.017 (0.924-1.120) | 1.017 (0.923-1.120) |
| 1.8-2.2 | Ref. | Ref. | Ref. | Ref. |
| 2.2-2.7 | 1.026 (0.926-1.136) | 1.025 (0.926-1.136) | 1.024 (0.925-1.134) | 1.024 (0.925-1.134) |
| ≥2.7 | 1.022 (0.928-1.126) | 1.023 (0.928-1.126) | 1.021 (0.927-1.124) | 1.021 (0.927-1.125) |
| Model 1 adjusted for age and sex. Model 2 adjusted for variables in model 1 and smoking, alcohol consumption, body mass index, and physical activity. Model 3 adjusted for variables in model 2 and diabetes, hypertension, hyperlipidemia, eGFR, hs-CRP, and snoring. Model 4 adjusted for variables in model 3 and antihypertensive, lipid-lowering and glucose-lowering drugs.  Abbreviation: MC, monocyte count; LC, lymphocyte count; hs-CRP, high-sensitivity C-reactive protein and eGFR indicates estimated glomerular filtration rate. | | | | |

Supplemental Table 5. Sensitive analysis for the association of different MLR groups with risk of cardiac conduction block

| Cardiac conduction block | HR (95% CI) | | | |
| --- | --- | --- | --- | --- |
| Q1 | Q2 | Q3 | Q4 |
| MLR score | <0.125 | 0.125-0.167 | 0.167-0.219 | ≥0.219 |
| Model 1a | 1.115 (1.002-1.239) | Ref. | 1.097 (0.986-1.220) | 1.195 (1.074-1.328) |
| Model 2a | 1.107 (1.000-1.226) | Ref. | 1.140 (1.031-1.261) | 1.210 (1.093-1.339) |
| Model 3b | 1.029 (0.971-1.091) | Ref. | 1.122 (1.056-1.191) | 1.145 (1.081-1.213) |
| Model 4a | 1.107 (1.001-1.224) | Ref. | 1.133 (1.026-1.252) | 1.212 (1.097-1.340) |
| Model 1 excluding new onset Cardiac conduction block were followed up within 2 years.  Model 2 excluding new onset myocardial infarction, atrial fibrillation and heart failure during follow-up.  Model 3 Time varying MLR.  Model 4 Competing risk analysis.  a Model adjusted for age, sex, smoking, alcohol consumption, body mass index, physical activity, diabetes, hypertension, hyperlipidemia, eGFR, hs-CRP, snoring, antihypertensive, lipid-lowering and glucose-lowering drugs.  b Model adjusted for time-dependent variables age smoking, alcohol consumption, body mass index, physical activity, diabetes, hypertension, hyperlipidemia, eGFR, hs-CRP, snoring, antihypertensive, lipid-lowering and glucose-lowering drugs, and for non-time-dependent variables sex.  Abbreviation: MLR, monocyte to lymphocyte ratio; hs-CRP, high-sensitivity C-reactive protein ; eGFR, estimated glomerular filtration rate; Ref, reference; HR, hazard ratio and CI, confidence interval. | | | | |


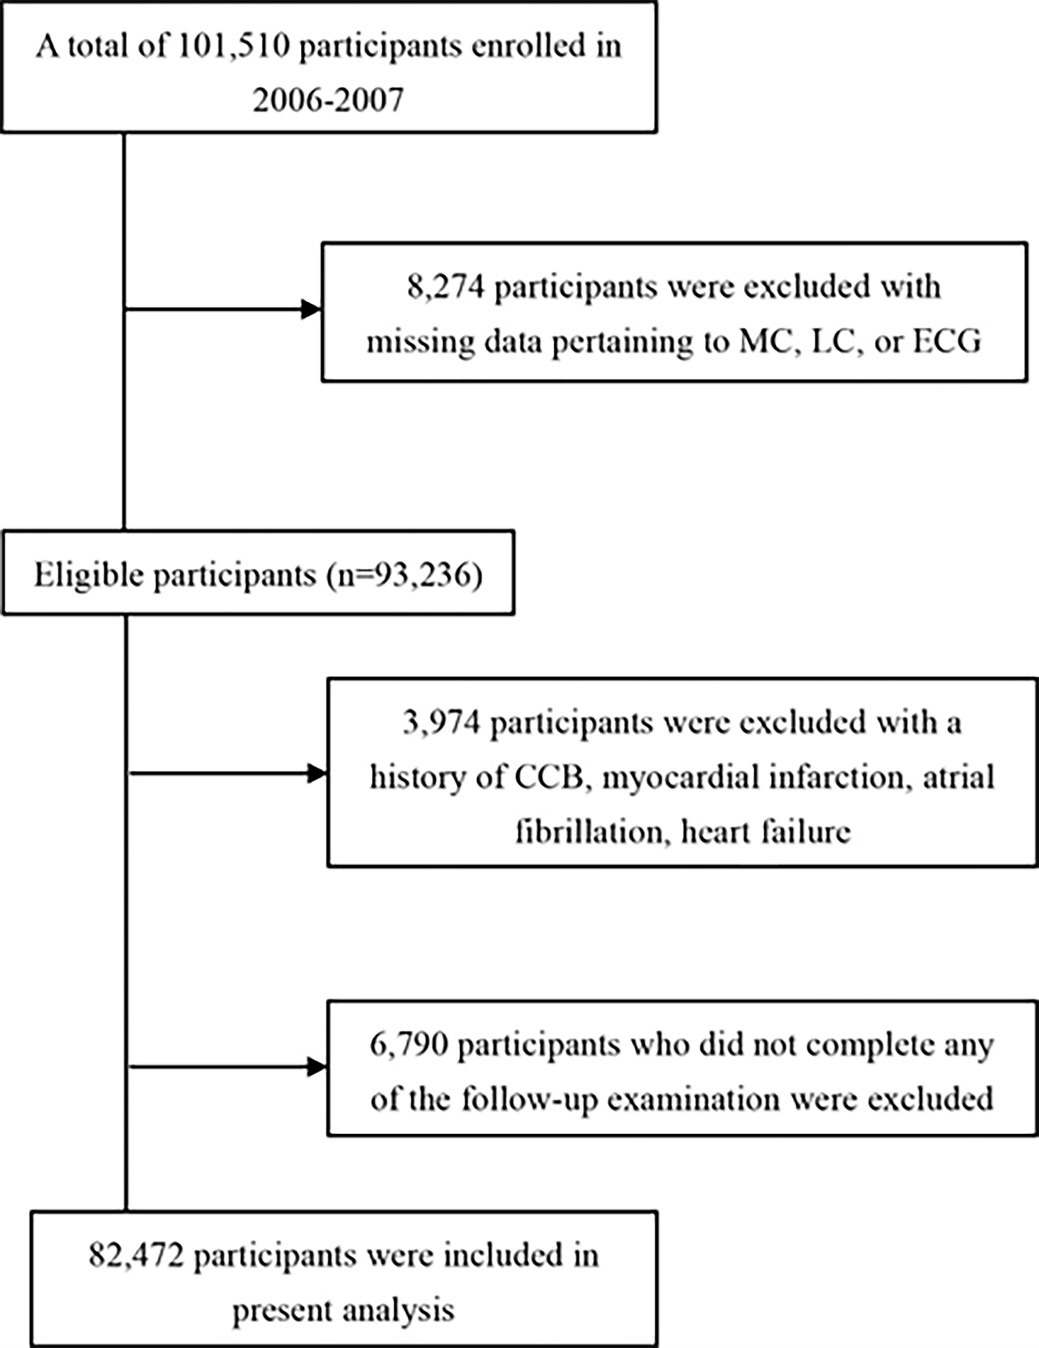


**Supplementary Figure 1.** Flow chart of study participants.

**Abbreviations:** MC, monocyte count; LC, lymphocyte count; ECG, electrocardiograph; CCB, cardiac conduction block.


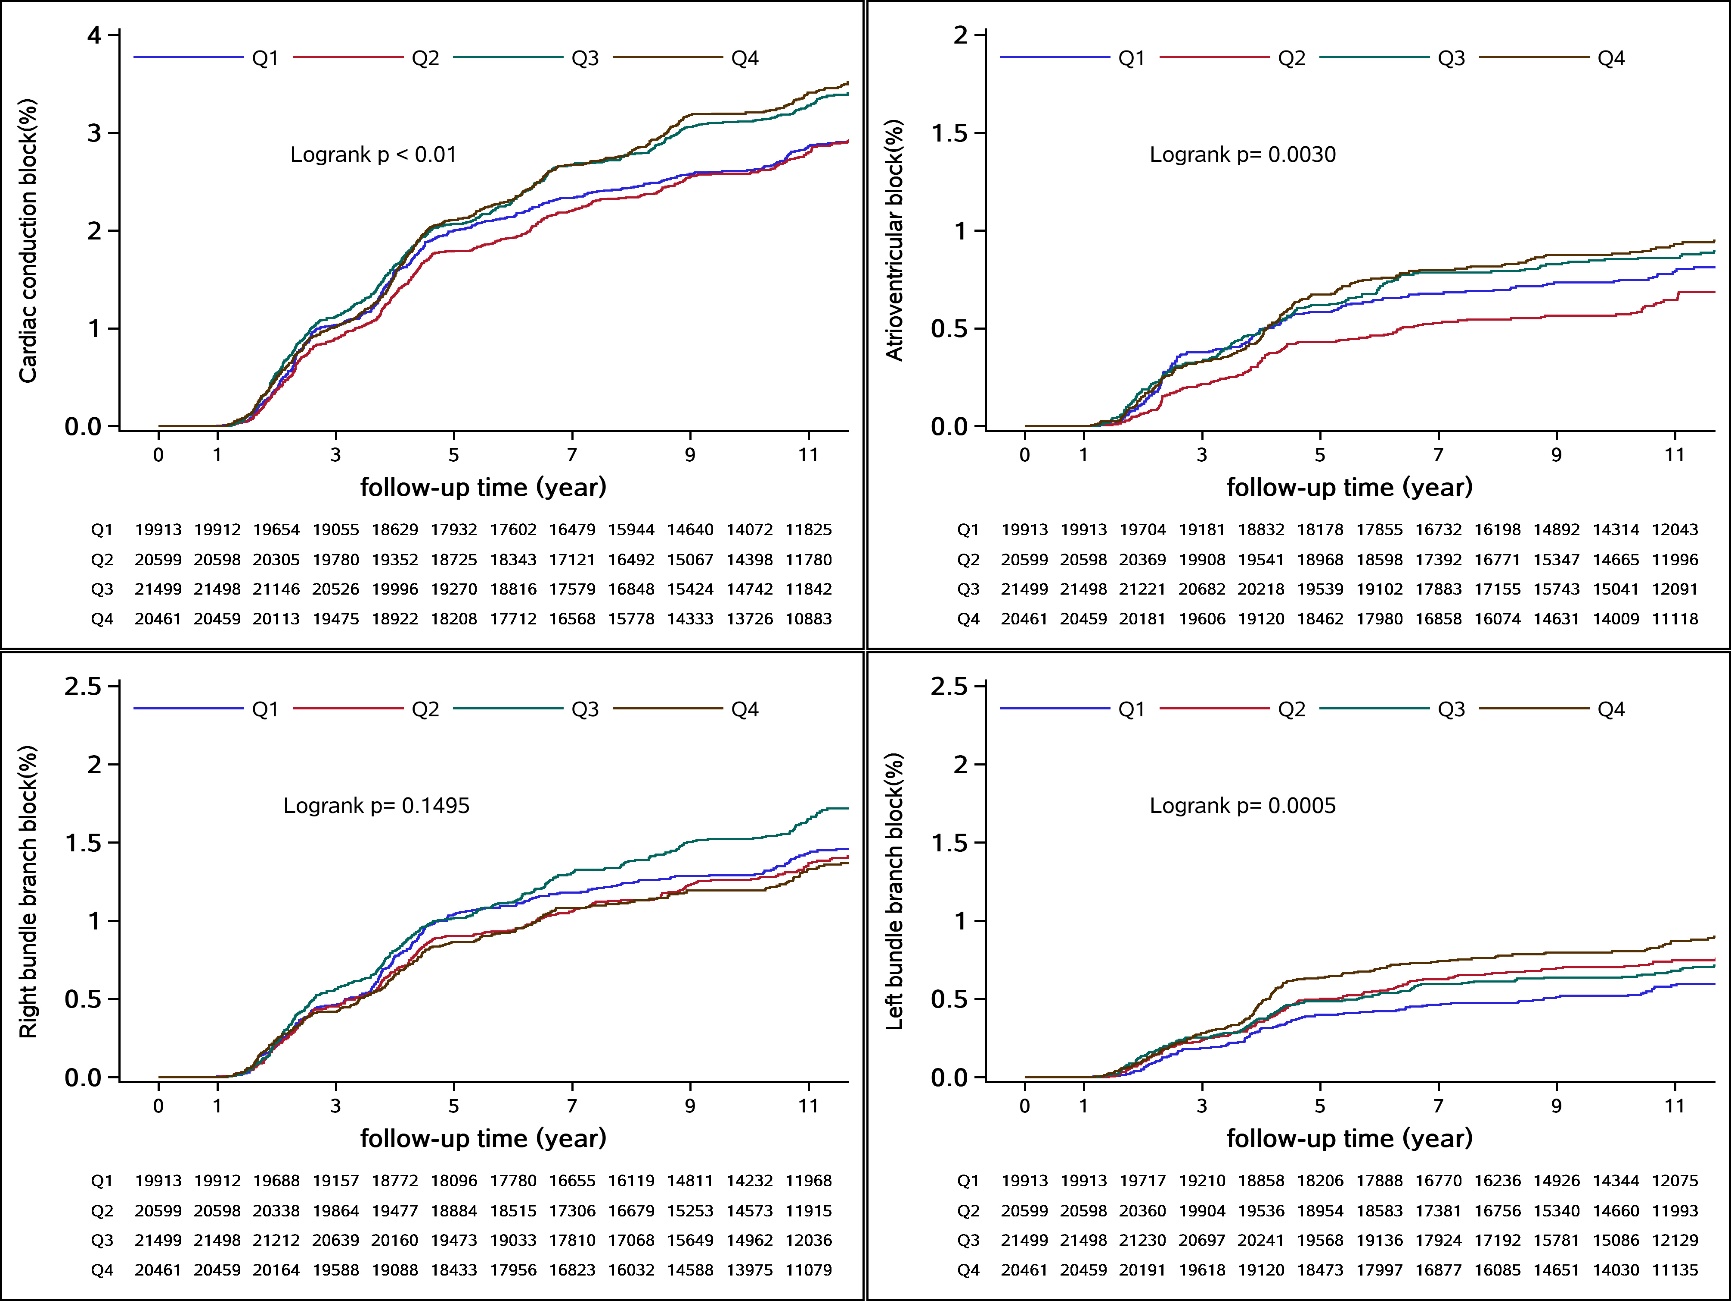


**Supplementary Figure 2.** Cumulative incidence of cardiac conduction block and its subtypes according to categories of monocyte to lymphocyte ratio.
